# Supplementary material
Source: Royal Society of Chemistry journal article supplement (doi:10.1039/d6cc02148d)
Supplement: d6cc02148d1.pdf [file d6cc02148d1.pdf]

## Supporting Information

### Amorphous Ni<sub>3</sub>MnB Nanoparticles Facilitate Low-Temperature Hydrogen

#### Desorption from LiBH<sub>4</sub> Solid-State Hydrogen Storage

Dong Yin <sup>a</sup>, Fuying Wu <sup>a</sup>, Liuting Zhang <sup>a, \*</sup>

<sup>a</sup> *School of Energy and Power, Jiangsu University of Science and Technology,*

*Zhenjiang 212100, China*

\* Corresponding authors.

*E-mail address:* [zhanglt89@just.edu.cn](mailto:zhanglt89@just.edu.cn)

#### **This file includes:**

Table S1

Figure.S1 to S7

Table S1. ICP test results of the Ni<sub>3</sub>MnB sample

| Sample Number       | Element Name | Dilution factor (f) | Elemental content of the sample(mg/kg) | Sample elemental content |
|---------------------|--------------|---------------------|----------------------------------------|--------------------------|
| Ni <sub>3</sub> MnB | Ni           | 1000                | 633266.06                              | 63.3266%                 |
| Ni <sub>3</sub> MnB | Mn           | 10                  | 6096.07                                | 0.6096%                  |

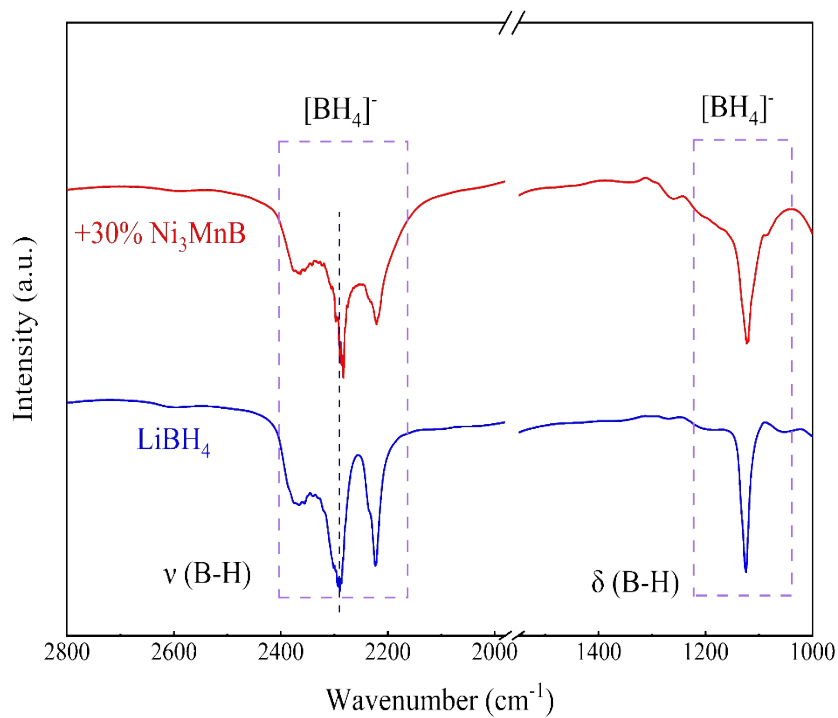

Fig. S1. FT-IR spectra of pure  $\text{LiBH}_4$  and the  $\text{LiBH}_4 + 30 \text{ wt}\% \text{ Ni}_3\text{MnB}$  composite at room temperature.

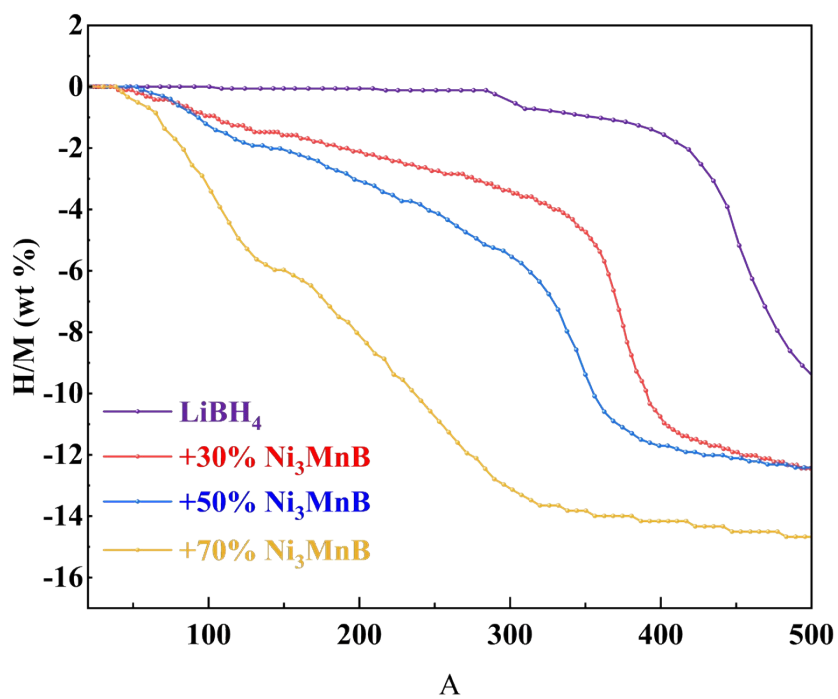

Fig. S2. Hydrogen release curves calculated based on the actual  $\text{LiBH}_4$  content for different doping levels.

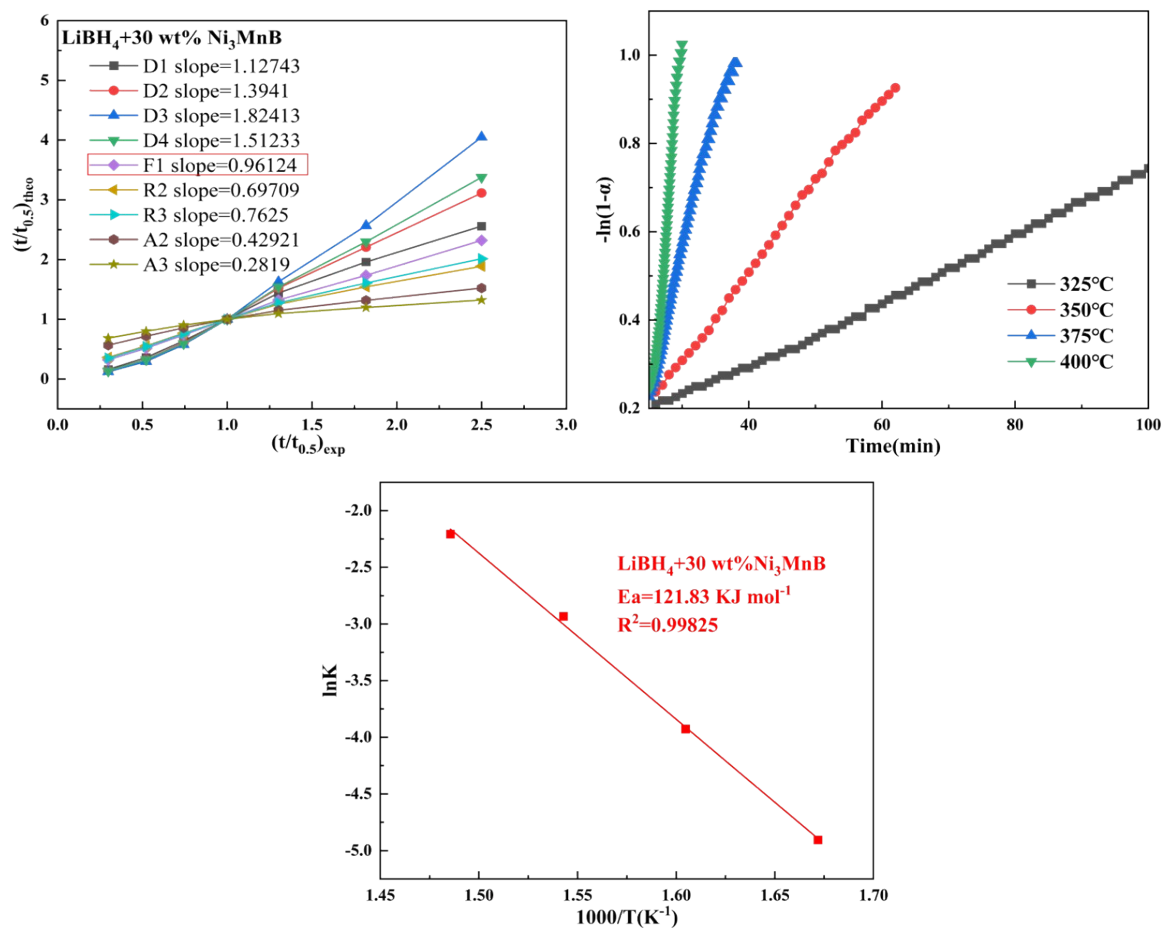

Fig S3. Kinetic behavior of LiBH<sub>4</sub> + 30 wt% Ni<sub>3</sub>MnB.

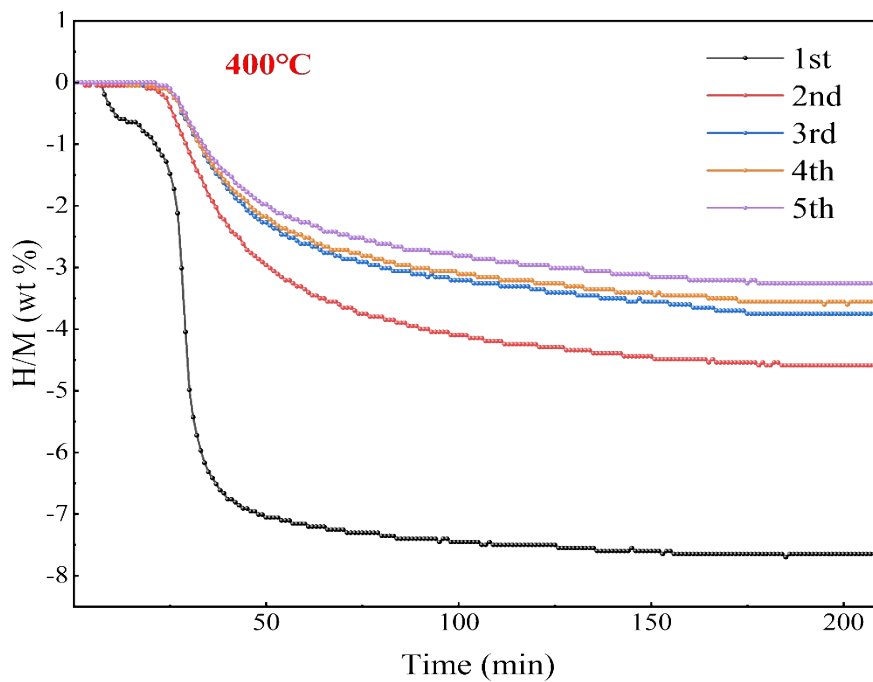

Fig S4. Cycling performance of LiBH<sub>4</sub> + 30 wt% Ni<sub>3</sub>MnB.

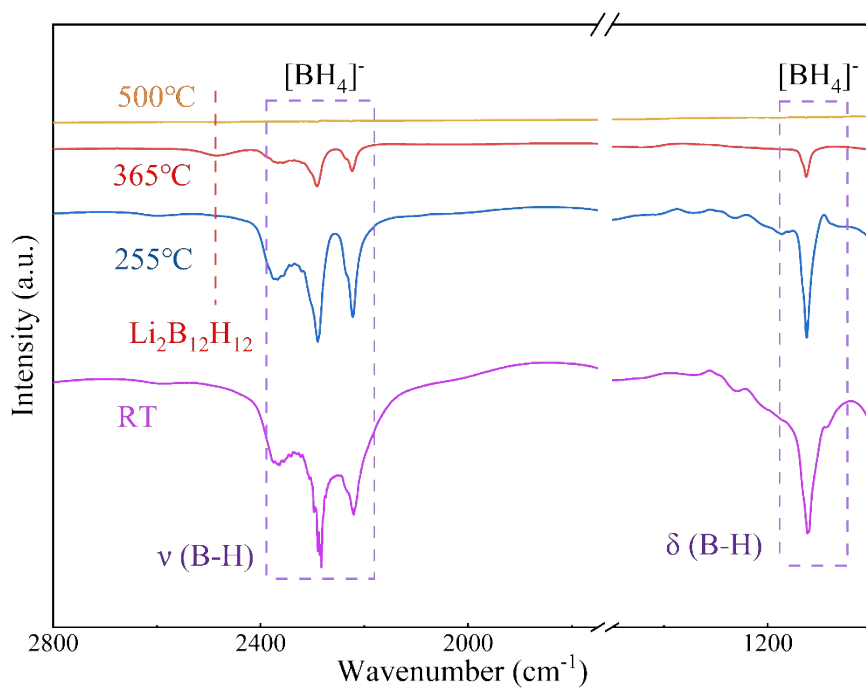

Fig.S5 FT-IR spectra of LiBH<sub>4</sub>+ 30 wt% Ni<sub>3</sub>MnB in the hydrogen-releasing state at different temperature stages.

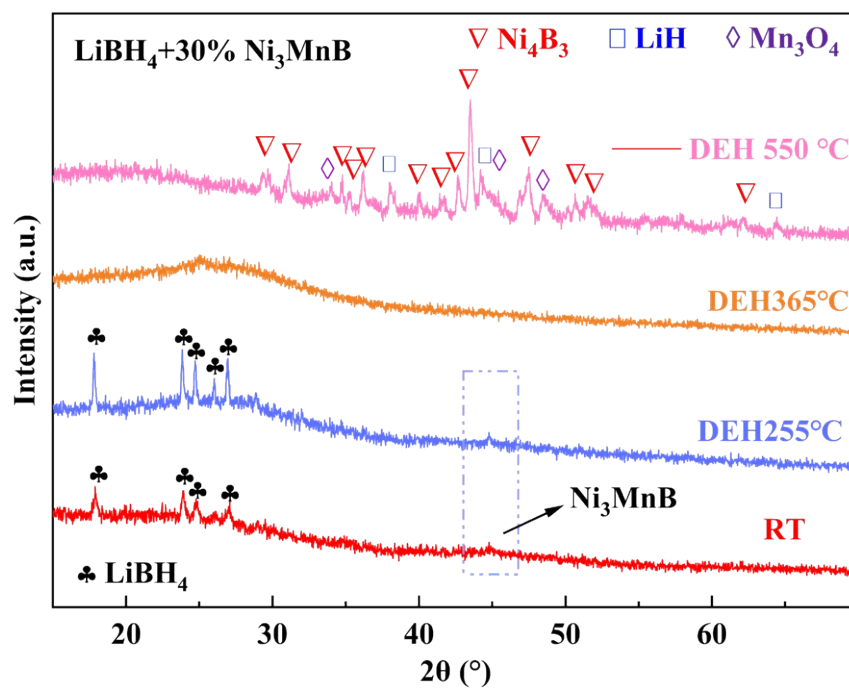

Fig.S6 XRD patterns of  $\text{LiBH}_4 + 30 \text{ wt}\% \text{Ni}_3\text{MnB}$  in the hydrogen-releasing state at different temperature stages.

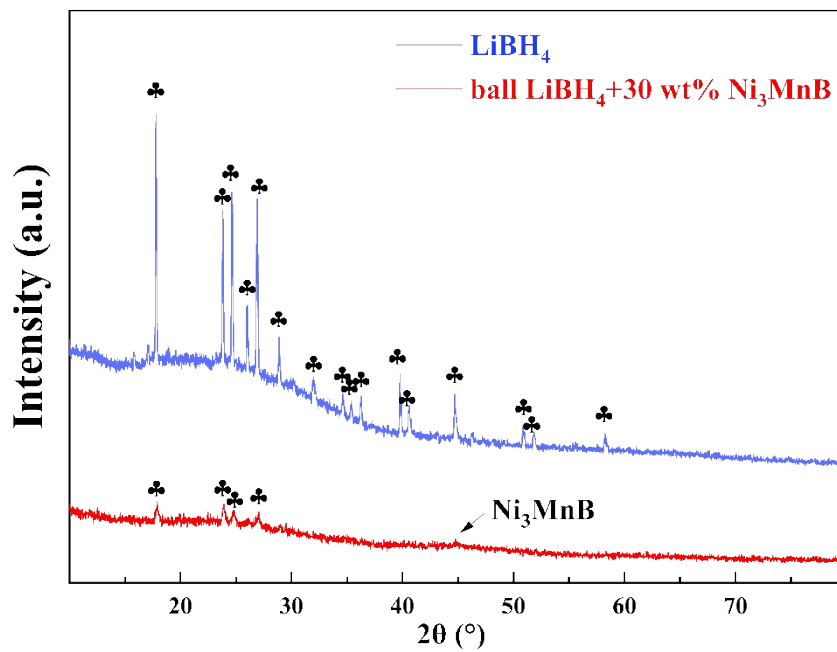

Fig.S7 XRD patterns of  $\text{LiBH}_4$  and ball-milled  $\text{LiBH}_4 + 30 \text{ wt}\% \text{Ni}_3\text{MnB}$ .
